# Supplementary material
Source: publisher figshare collection journal article supplement (https://geolsoc.figshare.com/articles/dataset/_/3453983)
Supplement: Supplementary file 2 [file 1]

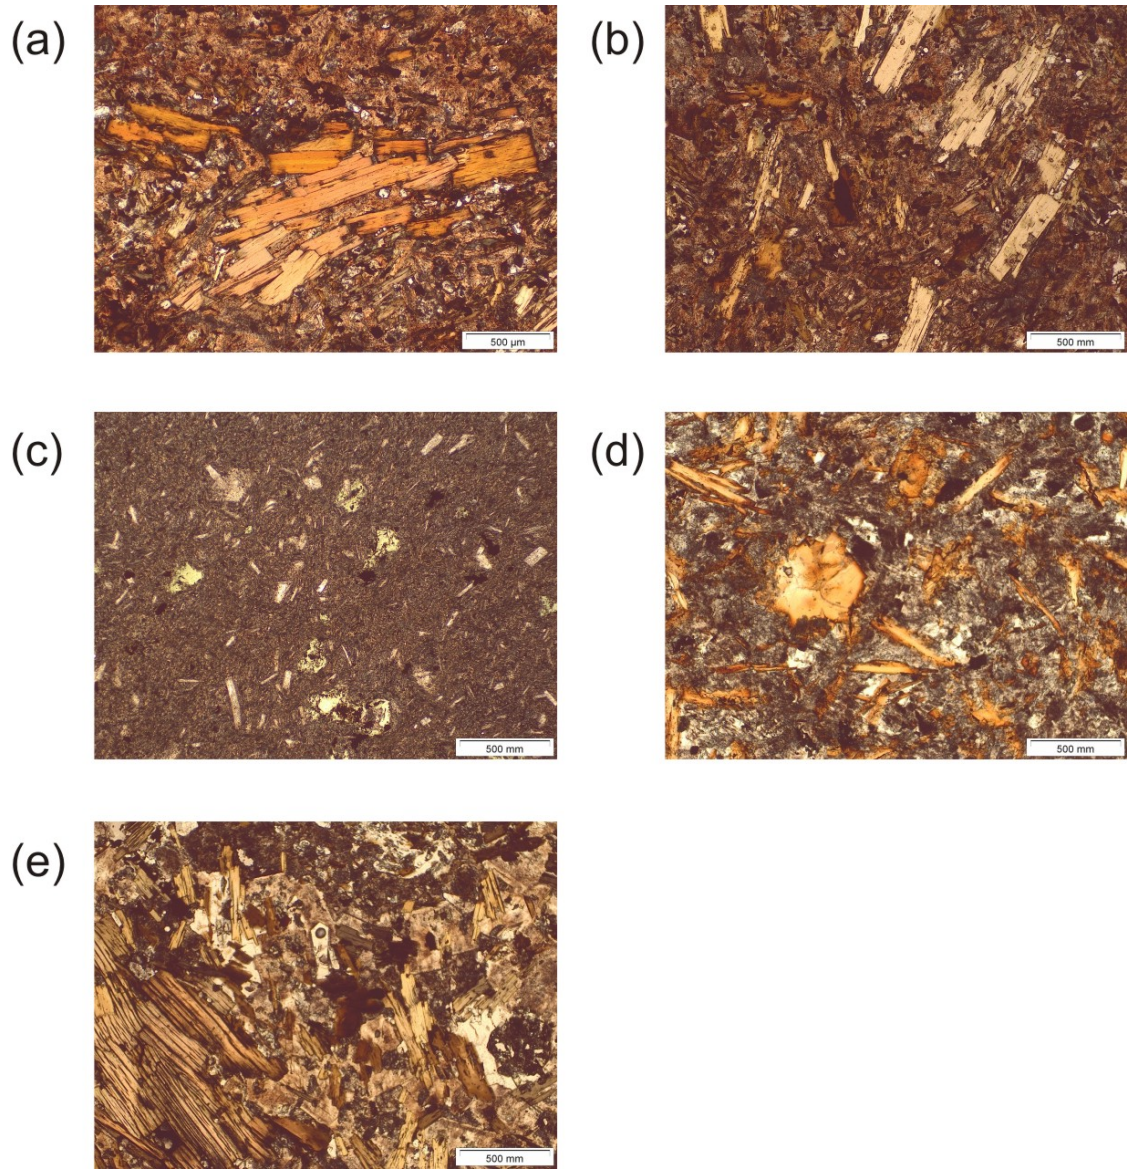

Fig. SP-2. Photomicrographs (PPL) of samples selected for Ar-Ar analysis: a) NED01; b) NED03; c) NED04; d) NED07; e) NED12. Scale bar is 500 μm.
