# Supplementary material
Source: publisher figshare collection journal article supplement (https://geolsoc.figshare.com/articles/dataset/_/3453983)

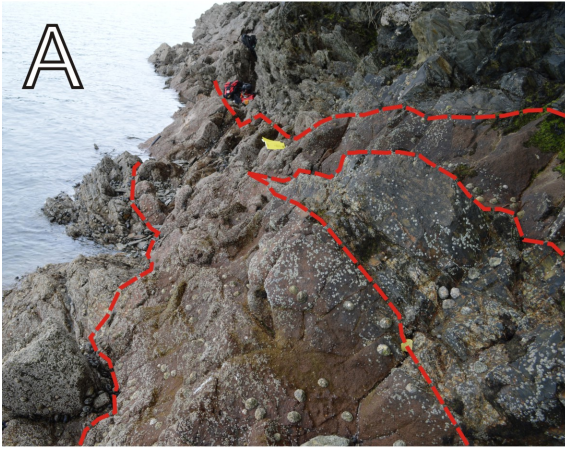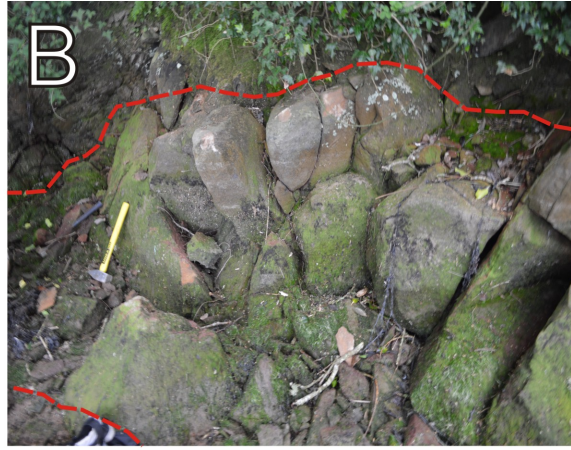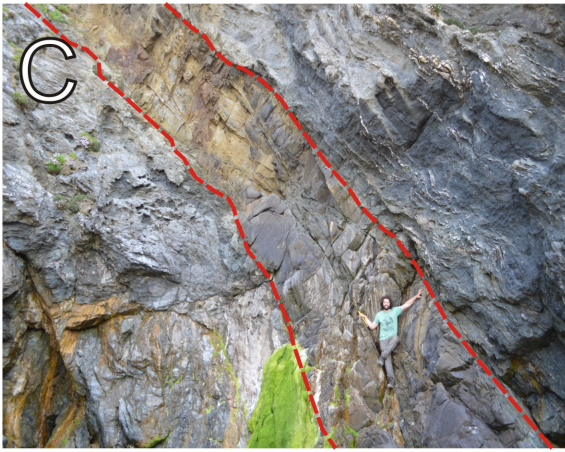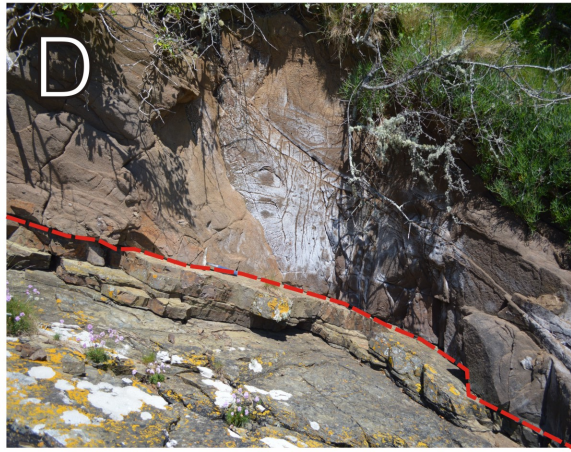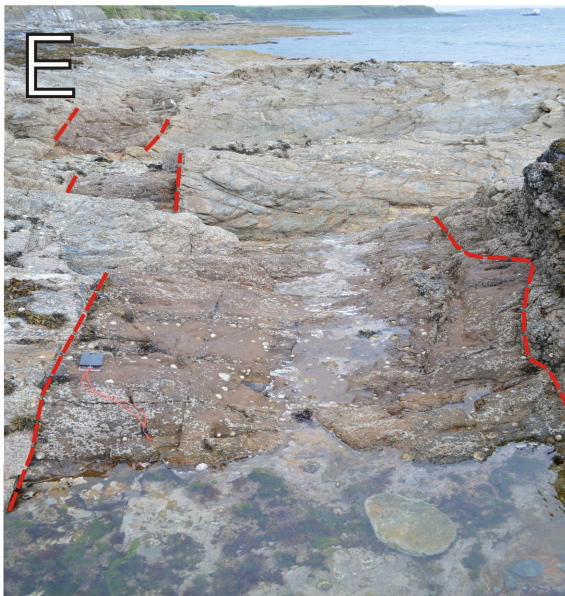

Fig. SP-1. Photographs of sample locations: a) NED01; b) NED03; c) NED04; d) NED12; e) NED07

Supplement: Supplementary file 1 [file 1]
